# Supplementary material for: Machine learning combined with radiomics and deep learning features extracted from CT images: a novel AI model to distinguish benign from malignant ovarian tumors
Source: Springer Nature journal article supplement (doi:10.1186/s13244-023-01412-x), 2023-04-24
Supplement: MOESM1 [file 25276368]

## Electronic Supplementary Material

### Machine learning combined with radiomics and deep learning features extracted from CT images: A novel AI model to distinguish benign from malignant ovarian tumors

**Supplementary Table 1.** Radiomics features extracted in this study.

| Histogram (n=12)   | LoG (n=12)         | Wavelet (n=96)                                              | GLCM (n=9)      |
|--------------------|--------------------|-------------------------------------------------------------|-----------------|
| Mean               | Mean               | Mean (LLL, LLH, LHL, LHH, HLL, HLH, HHL, HHH)               | Homogeneity     |
| Standard deviation | Standard deviation | Standard deviation (LLL, LLH, LHL, LHH, HLL, HLH, HHL, HHH) | Energy          |
| Entropy            | Entropy            | Entropy (LLL, LLH, LHL, LHH, HLL, HLH, HHL, HHH)            | Contrast        |
| 5th percentile     | 5th percentile     | 5th percentile (LLL, LLH, LHL, LHH, HLL, HLH, HHL, HHH)     | Dissimilarity   |
| 10th percentile    | 10th percentile    | 10th percentile (LLL, LLH, LHL, LHH, HLL, HLH, HHL, HHH)    | Autocorrelation |
| 25th percentile    | 25th percentile    | 25th percentile (LLL, LLH, LHL, LHH, HLL, HLH, HHL, HHH)    | Entropy         |
| 50th percentile    | 50th percentile    | 50th percentile (LLL, LLH, LHL, LHH, HLL, HLH, HHL, HHH)    | Sum average     |
| 75th percentile    | 75th percentile    | 75th percentile (LLL, LLH, LHL, LHH, HLL, HLH, HHL, HHH)    | Correlation     |
| 90th percentile    | 90th percentile    | 90th percentile (LLL, LLH, LHL, LHH, HLL, HLH, HHL, HHH)    | Variance        |
| 95th percentile    | 95th percentile    | 95th percentile (LLL, LLH, LHL, LHH, HLL, HLH, HHL, HHH)    |                 |
| Skewness           | Skewness           | Skewness (LLL, LLH, LHL, LHH, HLL, HLH, HHL, HHH)           |                 |
| Kurtosis           | Kurtosis           | Kurtosis (LLL, LLH, LHL, LHH, HLL, HLH, HHL, HHH)           |                 |

Notes: LoG, Laplacian of Gaussian; GLCM, gray-level co-occurrence matrix.

**Supplementary Table 2.** Patients and tumor characteristics for the training and testing sets.

|                                | Training set (n=129) | Testing set (n=56) | p value |
|--------------------------------|----------------------|--------------------|---------|
| <b>Benign</b>                  | 75 (58.1%)           | 37 (66.1%)         | 0.3118  |
| <b>Malignant</b>               | 54 (41.9%)           | 19 (33.9%)         |         |
| <b>Age (years)</b>             | 47.1 ± 14.1          | 45.0 ± 15.3        | 0.3696  |
| <b>Volume (cm<sup>3</sup>)</b> | 732.9 ± 1101.8       | 551.6 ± 785.7      | 0.2667  |
| <b>CA-125</b>                  |                      |                    |         |
| ≤ 35 U/mL                      | 61 (47.3%)           | 23 (41.1%)         | 0.4366  |
| > 35 U/mL                      | 68 (52.7%)           | 33 (58.9%)         |         |
| <b>Side</b>                    |                      |                    |         |
| Unilateral                     | 89 (69.0%)           | 38 (67.9%)         | 0.8788  |
| Bilateral                      | 40 (31.0%)           | 18 (32.1%)         |         |

Notes: All values are expressed as the mean ± SD or number (%); CA-125, cancer antigen 125.

## Electronic Supplementary Material

**Supplementary Table 3.** Performance metrics of AI models on training set.

|                       | Accuracy | Sensitivity | Specificity | AUC  | Positive Predictive Rate | Negative Predictive Rate | F1 Score |
|-----------------------|----------|-------------|-------------|------|--------------------------|--------------------------|----------|
| <b>Radiomics</b>      |          |             |             |      |                          |                          |          |
| KNN                   | 0.59     | 0.59        | 0.59        | 0.65 | 0.51                     | 0.67                     | 0.55     |
| SVM                   | 0.61     | 0.06        | 1           | 0.70 | 1                        | 0.60                     | 0.11     |
| LR                    | 0.61     | 0.41        | 0.76        | 0.71 | 0.55                     | 0.64                     | 0.47     |
| RF                    | 0.58     | 0.48        | 0.65        | 0.71 | 0.50                     | 0.64                     | 0.51     |
| <b>DL</b>             |          |             |             |      |                          |                          |          |
| KNN                   | 0.61     | 0.56        | 0.65        | 0.61 | 0.54                     | 0.67                     | 0.55     |
| SVM                   | 0.58     | 0           | 1           | 0.58 | -                        | 0.58                     | -        |
| LR                    | 0.65     | 0.28        | 0.92        | 0.64 | 0.71                     | 0.64                     | 0.40     |
| RF                    | 0.74     | 0.67        | 0.80        | 0.82 | 0.70                     | 0.76                     | 0.67     |
| <b>Clinical</b>       |          |             |             |      |                          |                          |          |
| KNN                   | 0.66     | 0.58        | 0.70        | 0.65 | 0.60                     | 0.71                     | 0.59     |
| SVM                   | 0.56     | 0.61        | 0.52        | 0.66 | 0.48                     | 0.65                     | 0.54     |
| LR                    | 0.75     | 0.67        | 0.81        | 0.77 | 0.72                     | 0.77                     | 0.69     |
| RF                    | 0.76     | 0.65        | 0.84        | 0.76 | 0.75                     | 0.77                     | 0.69     |
| <b>Radiomics + DL</b> |          |             |             |      |                          |                          |          |
| KNN                   | 0.71     | 0.69        | 0.72        | 0.71 | 0.64                     | 0.76                     | 0.66     |
| SVM                   | 0.58     | 0           | 1           | 0.73 | -                        | 0.58                     | -        |
| LR                    | 0.73     | 0.52        | 0.88        | 0.80 | 0.76                     | 0.72                     | 0.62     |
| RF                    | 0.78     | 0.70        | 0.83        | 0.85 | 0.75                     | 0.80                     | 0.72     |
| <b>Ensemble</b>       |          |             |             |      |                          |                          |          |
| KNN                   | 0.68     | 0.59        | 0.75        | 0.67 | 0.63                     | 0.72                     | 0.61     |
| SVM                   | 0.68     | 0.50        | 0.81        | 0.72 | 0.66                     | 0.69                     | 0.57     |
| LR                    | 0.77     | 0.65        | 0.85        | 0.80 | 0.76                     | 0.77                     | 0.70     |
| RF                    | 0.80     | 0.74        | 0.84        | 0.86 | 0.77                     | 0.82                     | 0.75     |

Notes: AI, artificial intelligence; AUC, area under the ROC curve; DL, deep learning; KNN, K-nearest neighbor; SVM, support vector machine; LR, logistic regression; RF, random forest.

## Electronic Supplementary Material

**Supplementary Table 4.** Performance metrics of AI models on testing set.

|                       | Accuracy | Sensitivity | Specificity | AUC  | Positive Predictive Rate | Negative Predictive Rate | F1 Score |
|-----------------------|----------|-------------|-------------|------|--------------------------|--------------------------|----------|
| <b>Radiomics</b>      |          |             |             |      |                          |                          |          |
| KNN                   | 0.59     | 0.47        | 0.65        | 0.56 | 0.41                     | 0.71                     | 0.44     |
| SVM                   | 0.66     | 0           | 1           | 0.59 | -                        | 0.66                     | -        |
| LR                    | 0.61     | 0.32        | 0.76        | 0.66 | 0.40                     | 0.68                     | 0.35     |
| RF                    | 0.70     | 0.53        | 0.78        | 0.75 | 0.56                     | 0.76                     | 0.54     |
| <b>DL</b>             |          |             |             |      |                          |                          |          |
| KNN                   | 0.66     | 0.53        | 0.73        | 0.63 | 0.50                     | 0.75                     | 0.51     |
| SVM                   | 0.66     | 0           | 1           | 0.68 | -                        | 0.66                     | -        |
| LR                    | 0.73     | 0.21        | 1           | 0.89 | 1                        | 0.71                     | 0.35     |
| RF                    | 0.68     | 0.47        | 0.78        | 0.70 | 0.53                     | 0.74                     | 0.50     |
| <b>Clinical</b>       |          |             |             |      |                          |                          |          |
| KNN                   | 0.68     | 0.45        | 0.75        | 0.60 | 0.53                     | 0.72                     | 0.47     |
| SVM                   | 0.71     | 0.26        | 0.95        | 0.79 | 0.71                     | 0.71                     | 0.38     |
| LR                    | 0.73     | 0.53        | 0.84        | 0.82 | 0.63                     | 0.78                     | 0.57     |
| RF                    | 0.75     | 0.47        | 0.89        | 0.73 | 0.69                     | 0.77                     | 0.56     |
| <b>Radiomics + DL</b> |          |             |             |      |                          |                          |          |
| KNN                   | 0.71     | 0.53        | 0.81        | 0.67 | 0.59                     | 0.77                     | 0.56     |
| SVM                   | 0.66     | 0           | 1           | 0.57 | -                        | 0.66                     | -        |
| LR                    | 0.71     | 0.37        | 0.89        | 0.82 | 0.64                     | 0.73                     | 0.47     |
| RF                    | 0.68     | 0.53        | 0.76        | 0.75 | 0.53                     | 0.76                     | 0.53     |
| <b>Ensemble</b>       |          |             |             |      |                          |                          |          |
| KNN                   | 0.70     | 0.47        | 0.81        | 0.64 | 0.56                     | 0.75                     | 0.51     |
| SVM                   | 0.36     | 0.74        | 0.16        | 0.50 | 0.31                     | 0.55                     | 0.44     |
| LR                    | 0.82     | 0.68        | 0.89        | 0.83 | 0.77                     | 0.85                     | 0.72     |
| RF                    | 0.75     | 0.58        | 0.84        | 0.83 | 0.65                     | 0.80                     | 0.61     |

Notes: AI, artificial intelligence; AUC, area under the ROC curve; DL, deep learning; KNN, K-nearest neighbor; SVM, support vector machine; LR, logistic regression; RF, random forest.

## Electronic Supplementary Material

**Supplementary Table 5.** Comparison of AUC between radiologists with and without AI assistance.

|                      | AUC              |                  | $\Delta$ | 95% CI          | p-value |
|----------------------|------------------|------------------|----------|-----------------|---------|
|                      | Without AI       | With AI          |          |                 |         |
| <b>Radiologist 1</b> | 0.61 (0.47-0.74) | 0.76 (0.63-0.86) | 0.15     | (0.010, 0.283)  | 0.0358  |
| <b>Radiologist 2</b> | 0.63 (0.49-0.75) | 0.83 (0.70-0.91) | 0.20     | (0.076, 0.321)  | 0.0015  |
| <b>Radiologist 3</b> | 0.73 (0.60-0.84) | 0.85 (0.73-0.93) | 0.12     | (-0.005, 0.249) | 0.0606  |
| <b>Radiologist 4</b> | 0.82 (0.69-0.91) | 0.85 (0.73-0.93) | 0.03     | (-0.037, 0.115) | 0.3110  |
| <b>Radiologist 5</b> | 0.83 (0.70-0.91) | 0.83 (0.70-0.92) | 0        | (-0.094, 0.097) | 0.9766  |

Junior radiologists: radiologist 1-3.

Senior radiologists: radiologist 4-5.

Notes: AI, artificial intelligence; AUC, area under the ROC curve.

**Supplementary Table 6.** Comparison of AUC between junior radiologists and senior radiologists.

|                      | AUC                |                                       | $\Delta$ | 95% CI          | p-value |
|----------------------|--------------------|---------------------------------------|----------|-----------------|---------|
|                      | Junior radiologist | Senior radiologist                    |          |                 |         |
| <b>Radiologist 1</b> | 0.61 (0.47-0.74)   | <b>Radiologist 4</b> 0.82 (0.69-0.91) | 0.21     | (0.036, 0.367)  | 0.0173  |
|                      |                    | <b>Radiologist 5</b> 0.83 (0.70-0.91) | 0.22     | (0.067, 0.356)  | 0.0041  |
| <b>Radiologist 2</b> | 0.63 (0.49-0.75)   | <b>Radiologist 4</b> 0.82 (0.69-0.91) | 0.19     | (0.062, 0.314)  | 0.0035  |
|                      |                    | <b>Radiologist 5</b> 0.83 (0.70-0.91) | 0.20     | (0.071, 0.324)  | 0.0022  |
| <b>Radiologist 3</b> | 0.73 (0.60-0.84)   | <b>Radiologist 4</b> 0.82 (0.69-0.91) | 0.09     | (-0.072, 0.239) | 0.2942  |
|                      |                    | <b>Radiologist 5</b> 0.83 (0.70-0.91) | 0.20     | (0.071, 0.324)  | 0.0022  |

Junior radiologists: radiologist 1-3.

Senior radiologists: radiologist 4-5.

Notes: AUC, area under the ROC curve.

**Supplementary Table 7.** Comparison of AUC between junior radiologists with AI and senior radiologists.

|                      | AUC                        |                                       | $\Delta$ | 95% CI          | p-value |
|----------------------|----------------------------|---------------------------------------|----------|-----------------|---------|
|                      | Junior radiologist with AI | Senior radiologist                    |          |                 |         |
| <b>Radiologist 1</b> | 0.76 (0.63-0.86)           | <b>Radiologist 4</b> 0.82 (0.69-0.91) | 0.06     | (-0.083, 0.192) | 0.4357  |
|                      |                            | <b>Radiologist 5</b> 0.83 (0.70-0.91) | 0.07     | (-0.080, 0.209) | 0.3791  |
| <b>Radiologist 2</b> | 0.83 (0.70-0.91)           | <b>Radiologist 4</b> 0.82 (0.69-0.91) | 0.01     | (-0.126, 0.147) | 0.8781  |
|                      |                            | <b>Radiologist 5</b> 0.83 (0.70-0.91) | 0.07     | (-0.080, 0.209) | 0.3791  |
| <b>Radiologist 3</b> | 0.85 (0.73-0.93)           | <b>Radiologist 4</b> 0.82 (0.69-0.91) | 0.03     | (-0.057, 0.134) | 0.4296  |
|                      |                            | <b>Radiologist 5</b> 0.83 (0.70-0.91) | 0.02     | (-0.065, 0.121) | 0.5488  |

Junior radiologists: radiologist 1-3.

Senior radiologists: radiologist 4-5.

Notes: AI, artificial intelligence; AUC, area under the ROC curve.

## Electronic Supplementary Material

**Supplementary Table 8.** Comparison of AUC between ensemble model and radiologists.

|                      | AUC              |                  | $\Delta$ | 95% CI          | p-value |
|----------------------|------------------|------------------|----------|-----------------|---------|
|                      | Radiologist      | Ensemble         |          |                 |         |
| <b>Radiologist 1</b> | 0.61 (0.47-0.74) |                  | 0.22     | (0.078, 0.362)  | 0.0025  |
| <b>Radiologist 2</b> | 0.63 (0.49-0.75) |                  | 0.20     | (0.011, 0.402)  | 0.0386  |
| <b>Radiologist 3</b> | 0.73 (0.60-0.84) | 0.83 (0.71-0.92) | 0.10     | (-0.068, 0.272) | 0.2409  |
| <b>Radiologist 4</b> | 0.82 (0.69-0.91) |                  | 0.01     | (-0.139, 0.176) | 0.8179  |
| <b>Radiologist 5</b> | 0.83 (0.70-0.91) |                  | 0        | (-0.142, 0.159) | 0.9115  |

Junior radiologists: radiologist 1-3.

Senior radiologists: radiologist 4-5.

Notes: AUC, area under the ROC curve.
